# Supplementary material for: Detection and Haplotype Construction of ring Chromosome 17 for Carrier Screening in Preimplantation Genetic Testing
Source: Research Square preprint supplement (doi:10.21203/rs.3.rs-4022562/v1), 2024-03-13
Supplement: Supplementary file 1 [file 97da03a084265e80b1770921.docx]

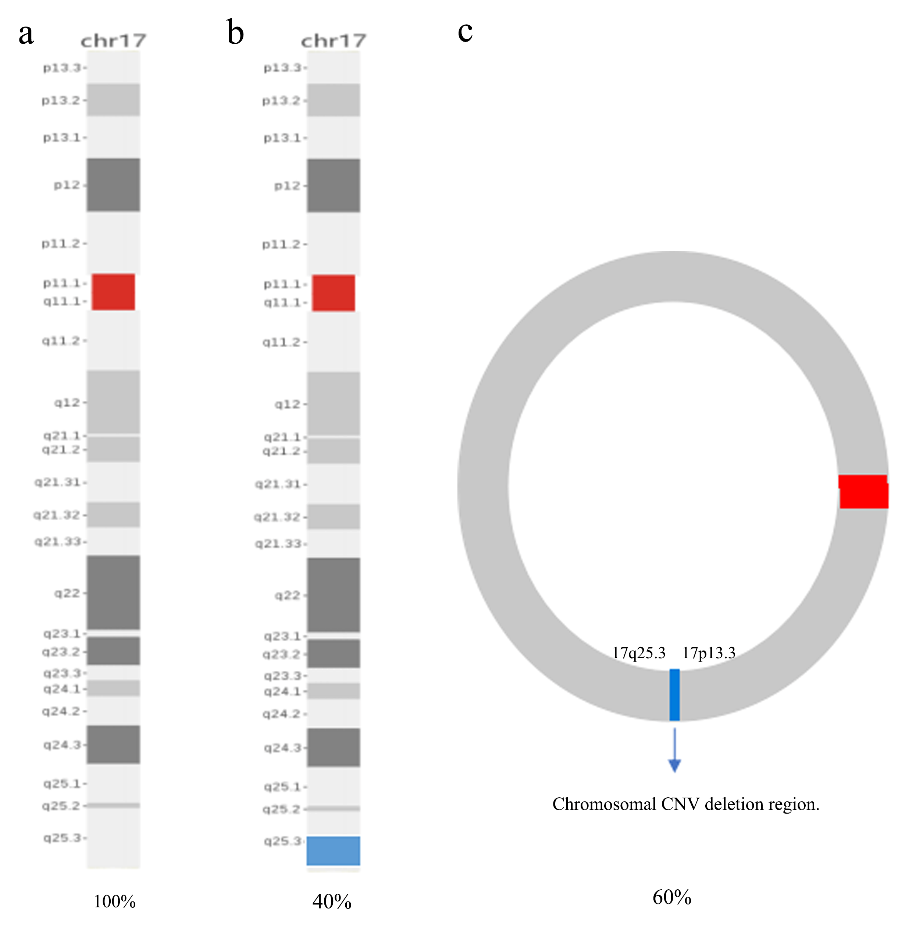


Figure S1. The three haplotypes of chromosome 17. (a) Fully normal haplotype (100%). (b) Haplotype with CNV deletion at the end but without ring formation (40%). (c) Haplotype with CNV deletion at the end leading to ring formation (60%).
